# Supplementary material for: Morphology-controlled CH3NH3PbI3films by hexane-assisted one-step solution deposition for hybrid perovskite mesoscopic solar cells with high reproductivity
Source: Royal Society of Chemistry journal article supplement (doi:10.1039/c5ta04051e), 2015-01-01
Supplement: c5ta04051e1.pdf [file c5ta04051e1.pdf]

# Morphology-Controlled $\text{CH}_3\text{NH}_3\text{PbI}_3$ Films by Hexane-Assisted One-Step Solution Deposition for Hybrid Perovskite Mesoscopic Solar Cells with High Reproductivity

Na Lin, Juan Qiao\*, Haopeng Dong, Fusheng Ma, Liduo Wang

Key Lab of Organic Optoelectronics and Molecular Engineering of Ministry of Education, Department of Chemistry, Tsinghua University, Beijing 100084, P. R. China

Corresponding author: \* Email: [jqiao@mail.tsinghua.edu.cn](mailto:jqiao@mail.tsinghua.edu.cn); Fax: +86-10-62795137

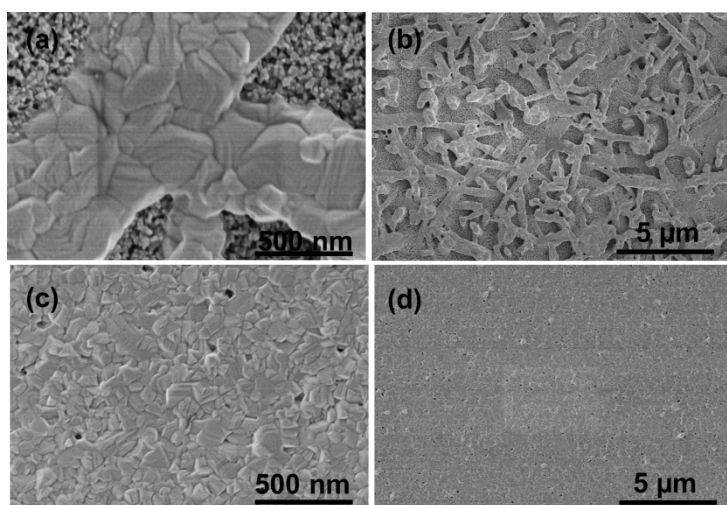

**Figure S1.** Typical SEM images of  $\text{CH}_3\text{NH}_3\text{PbI}_3$  perovskite spin-coated on mesoporous- $\text{TiO}_2$  layer by (a-b) conventional and (c-d) *n*-hexane-assisted one-step solution deposition.

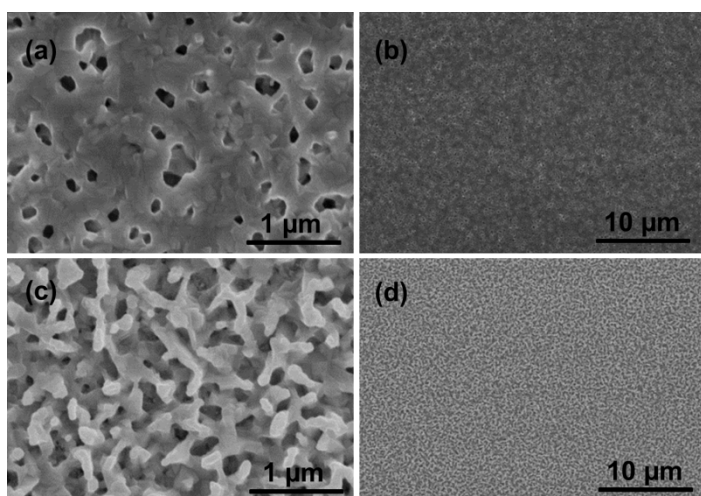

**Figure S2.** Typical SEM images of  $\text{CH}_3\text{NH}_3\text{PbI}_3$  perovskite spin-coated on compact  $\text{TiO}_2$  layer by dripping *n*-hexane at different delay times from the start of the spin coating process. (a-b) 6~8s; (c-d) 12~14s.

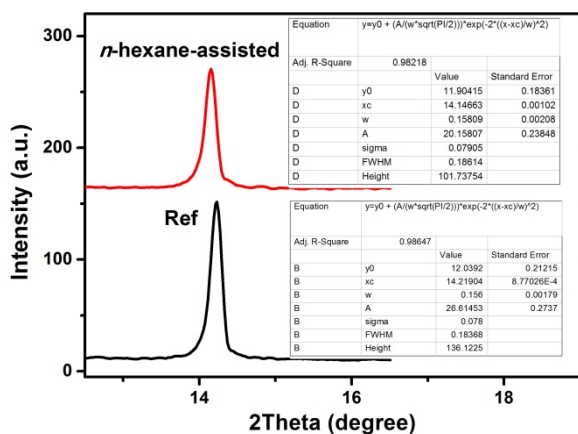

**Figure S3.** Comparison of crystallinity for perovskite films prepared by conventional and *n*-hexane-assisted one-step solution deposition. Full width half at maximum values of the (110) diffraction peak at 14.2 ° were obtained by Gaussian fit.

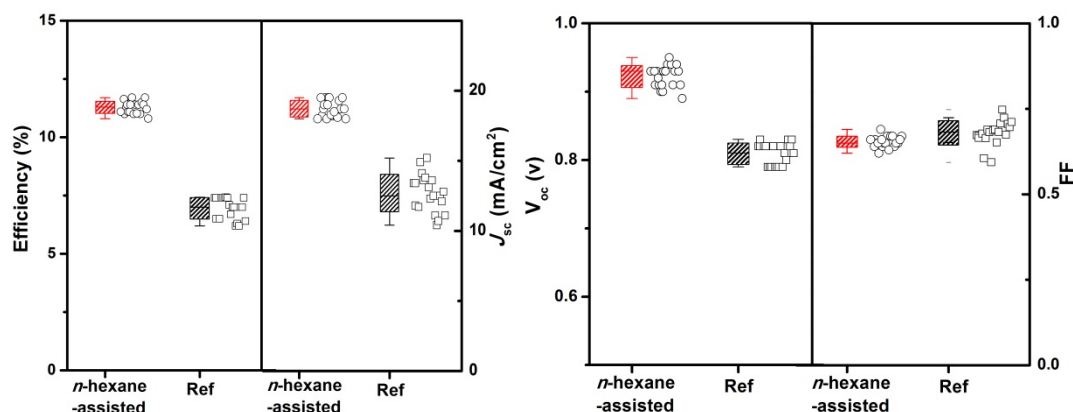

**Figure S4.** Box plots of the device performance parameters of FTO/c-TiO<sub>2</sub>/m-TiO<sub>2</sub>/CH<sub>3</sub>NH<sub>3</sub>PbI<sub>3</sub>/Spiro-OMeTAD/Au devices with and without *n*-hexane dripping during the CH<sub>3</sub>NH<sub>3</sub>PbI<sub>3</sub> perovskite deposition process.

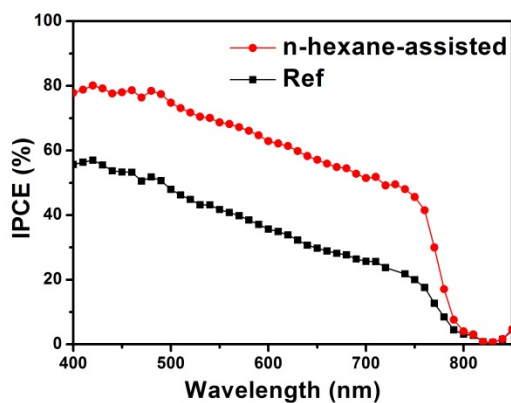

**Figure S5.** The IPCE of FTO/c-TiO<sub>2</sub>/ m-TiO<sub>2</sub>/CH<sub>3</sub>NH<sub>3</sub>PbI<sub>3</sub>/Spiro-OMeTAD/Au devices with and without *n*-hexane

dripping during the  $\text{CH}_3\text{NH}_3\text{PbI}_3$  perovskite deposition process.

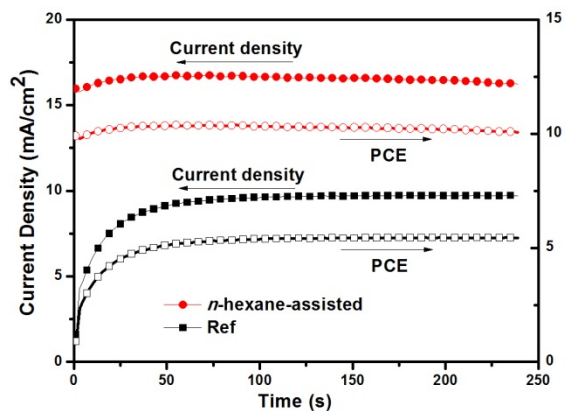

**Figure S6.** Photocurrent density and power conversion efficiency as a function of time for the FTO/c-TiO<sub>2</sub>/ m-TiO<sub>2</sub>/CH<sub>3</sub>NH<sub>3</sub>PbI<sub>3</sub>/Spiro-OMeTAD/Au cells with and without hexane-assisted solution deposition process held close to 0.58 V and 0.62 V forward bias respectively.

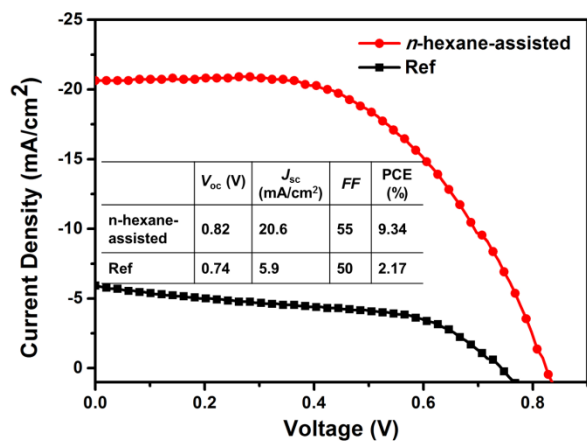

**Figure S7.** The  $J$ - $V$  characteristics of FTO/c-TiO<sub>2</sub>/CH<sub>3</sub>NH<sub>3</sub>PbI<sub>3</sub>/Spiro-OMeTAD/Au solar cells with and without hexane-assisted solution deposition process.

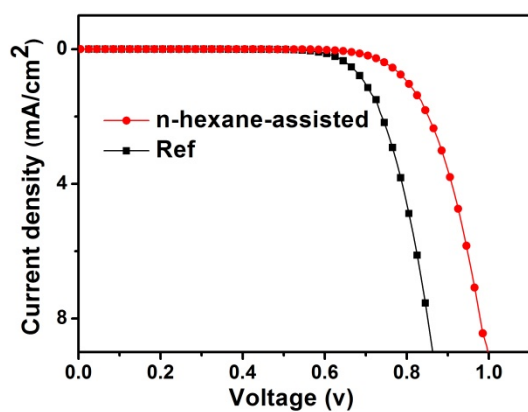

**Figure S8.** The dark current curves of devices with and without *n*-hexane dripping during the  $\text{CH}_3\text{NH}_3\text{PbI}_3$  perovskite deposition process.

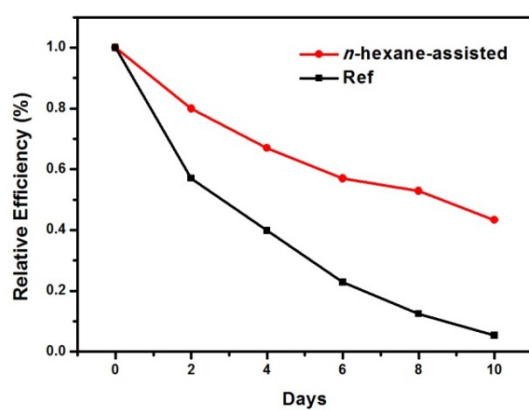

**Figure S9.** Relative efficiencies of perovskite solar cells versus time stored in air at room temperature under about 50% humidity without encapsulation, in which the perovskite films are fabricated with and without *n*-hexane dripping during the  $\text{CH}_3\text{NH}_3\text{PbI}_3$  deposition process.
